# Supplementary material for: Mapping intratumoral myeloid-T cell interactomes at single-cell resolution reveals targets for overcoming checkpoint inhibitor resistance
Source: PubMed Central journal article supplement (PMC11565996; doi:10.1101/2024.10.28.620093), 2024-10-31
Supplement: NIHPP2024.10.28.620093v1-supplement-2.pdf [file NIHPP2024.10.28.620093v1-supplement-2.pdf]

## **SUPPLEMENTAL INFORMATION**

Document S1. Figures S1-S10 and Table S1.

Supplemental File 1. Excel file containing full suite of differential expression results for differentially abundant neighborhood clusters of cell-cell communication, related to Fig. 3.

Supplemental File 2. Excel file containing full suite of differential expression results for differentially abundant neighborhood clusters of cell-cell communication, related to Fig. 4.

Supplemental File 3. Excel file containing full suite of differential expression results for differentially abundant neighborhood clusters of cell-cell communication, related to Fig. 5.

Supplemental File 4. Excel file containing full suite of differential expression results for 'durable' neighborhood clusters of cell-cell communication, related to Fig. 7.
